# Supplementary material for: Long-lived CD8+ T cell responses following Crimean-Congo haemorrhagic fever virus infection
Source: PubMed Central journal article supplement (PMC5752039; doi:10.1371/journal.pntd.0006149), 2017-12-19
Supplement: pntd.0006149.s001.pdf [file pntd.0006149.s001.pdf]

10  
 SPU103/87 EFKKGNGLVDTFNTNSYSFC  
 ArD15786 .....  
 ArD8194 .....  
 ROS/HUVLV-100 .....M.....  
 Kashmanov .....E...M.....  
 Drosdov .....E...M.....  
 Turkey-Kelkit06 .....M.....  
 Turkey200310849 .....M.....  
 KosovoHoti .....M.....  
 YL04057 .....  
 79121M18 .....  
 C-68031 .....  
 NIVA118595 .....  
 NIVA118594 .....  
 NIV112143 .....  
 TAJ/HU8966 .....  
 Matin .....  
 Afg09-2990 .....  
 Oman .....  
 Baghdad-12 .....Y.....  
 SPU556/87 .....  
 SPU97/85 .....  
 SPU431/85 .....  
 SPU415/85 .....  
 SPU4/81 .....  
 SPU128/81/7 .....  
 SPU187/90 .....  
 SPU45/88 .....  
 SPU48/90 .....  
 SudanAl-Fulah .....  
 SPU383/87 .....  
 SPU44/08 .....  
 SPU130/89 .....  
 SPU497/88 .....  
 SPU18/88 .....  
 ArD39554 .....  
 SudanAB1-2009 .....  
 Ibar10200 .....  
 Congo3010 .....S.....  
 UG3010 .....S.....  
 Semunya .....S.....  
 AP92 .....  
 N<sub>19-37</sub>

10  
 SPU103/87 DTFTNSYSFCESVPLNDRF  
 ArD15786 .....N.....  
 ArD8194 .....NM.....  
 ROS/HUVLV-100 .....N....K.....  
 Kashmanov .....N....K.....  
 Drosdov .....N....K.....  
 Turkey-Kelkit06 .....N....K.....  
 Turkey200310849 .....N....K.....  
 KosovoHoti .....N....K.....  
 YL04057 .....  
 79121M18 .....  
 C-68031 .....E.....  
 NIVA118595 .....  
 NIVA118594 .....  
 NIV112143 .....  
 TAJ/HU8966 .....  
 Matin .....  
 Afg09-2990 .....  
 Oman .....  
 Baghdad-12 ..Y.....  
 SPU556/87 .....  
 SPU97/85 .....  
 SPU431/85 .....K.....  
 SPU415/85 .....K.....  
 SPU4/81 .....K.....  
 SPU128/81/7 .....K.....  
 SPU187/90 .....K.....  
 SPU45/88 .....K.....  
 SPU48/90 .....K.....  
 SudanAl-Fulah .....K.....  
 SPU383/87 .....K.....  
 SPU44/08 .....K.....  
 SPU130/89 .....K.....  
 SPU497/88 .....K.....  
 SPU18/88 .....K.....  
 ArD39554 .....K.....  
 SudanAB1-2009 .....K.....  
 Ibar10200 .....  
 Congo3010 .....  
 UG3010 .....  
 Semunya .....  
 AP92 .....N.....  
 N<sub>28-46</sub>

10  
 SPU103/87 DIGFRVNANTAALSINKVLA  
 ArD15786 .....S.....  
 ArD8194 .....S.....  
 ROS/HUVLV-100 .....  
 Kashmanov .....  
 Drosdov .....  
 Turkey-Kelkit06 .....  
 Turkey200310849 .....  
 KosovoHoti .....  
 YL04057 .....T...H....  
 79121M18 .....T...H....  
 C-68031 .....H.....  
 NIVA118595 .....H.....  
 NIVA118594 .....H.....  
 NIV112143 .....H.....  
 TAJ/HU8966 .....H.....  
 Matin .....  
 Afg09-2990 .....  
 Oman .....  
 Baghdad-12 .....  
 SPU556/87 .....  
 SPU97/85 .....  
 SPU431/85 .....  
 SPU415/85 .....  
 SPU4/81 .....  
 SPU128/81/7 .....  
 SPU187/90 .....  
 SPU45/88 .....  
 SPU48/90 .....  
 SudanAl-Fulah .....  
 SPU383/87 .....  
 SPU44/08 .....  
 SPU130/89 .....  
 SPU497/88 .....  
 SPU18/88 .....  
 ArD39554 .....  
 SudanAB1-2009 .....  
 Ibar10200 .....  
 Congo3010 .....  
 UG3010 .....  
 Semunya .....  
 AP92 .....I...T.....  
 N<sub>136-154</sub>

10  
 SPU103/87 TAALSINKVLAIEYKVPGEIV  
 ArD15786 .....S.....  
 ArD8194 .....S.....  
 ROS/HUVLV-100 .....  
 Kashmanov .....  
 Drosdov .....  
 Turkey-Kelkit06 .....  
 Turkey200310849 .....  
 KosovoHoti .....  
 YL04057 .....T...H....  
 79121M18 .....T...H....  
 C-68031 .....H.....  
 NIVA118595 .....H.....  
 NIVA118594 .....H.....  
 NIV112143 .....H.....  
 TAJ/HU8966 .....H.....  
 Matin .....  
 Afg09-2990 .....  
 Oman .....  
 Baghdad-12 .....  
 SPU556/87 .....  
 SPU97/85 .....  
 SPU431/85 .....  
 SPU415/85 .....  
 SPU4/81 .....  
 SPU128/81/7 .....  
 SPU187/90 .....  
 SPU45/88 .....  
 SPU48/90 .....  
 SudanAl-Fulah .....  
 SPU383/87 .....  
 SPU44/08 .....  
 SPU130/89 .....  
 SPU497/88 .....  
 SPU18/88 .....  
 ArD39554 .....  
 SudanAB1-2009 .....  
 Ibar10200 .....  
 Congo3010 .....  
 UG3010 .....  
 Semunya .....  
 AP92 .....T.....L  
 N<sub>145-163</sub>

10  
 SPU103/87 DKHKDEVDRASADSMITNL  
 ArD15786 .....K.....V...  
 ArD8194 .....K.....V...  
 ROS/HUVLV-100 ...R...K.....  
 Kashmanov ...R...K.....  
 Drosdov ...R...K.....  
 Turkey-Kelkit06 ...R...K.....  
 Turkey200310849 ...R...K.....  
 KosovoHoti ...R...K.....  
 YL04057 N.....K.....  
 79121M18 N.....K.....  
 C-68031 .....K...N.....  
 NIVA118595 .....K...N.....  
 NIVA118594 .....K...N.....  
 NIV112143 .....K...N.....  
 TAJ/HU8966 .....K...N.....  
 Matin .....K.....  
 Afg09-2990 .....K.....  
 Oman .....K.....  
 Baghdad-12 .....K...N.V...  
 SPU556/87 .....  
 SPU97/85 .....  
 SPU431/85 .....  
 SPU415/85 .....  
 SPU4/81 .....  
 SPU128/81/7 .....  
 SPU187/90 .....  
 SPU45/88 .....  
 SPU48/90 .....  
 SudanAl-Fulah .....  
 SPU383/87 .....  
 SPU44/08 .....  
 SPU130/89 .....  
 SPU497/88 .....  
 SPU18/88 .....V...  
 ArD39554 .....K.....  
 SudanAB1-2009 .....  
 Ibar10200 .....  
 Congo3010 .....K...G.V...  
 UG3010 .....K...G.V...  
 Semunya .....K...G.V...  
 AP92 ...R....KT...N.V.S.

10  
 SPU103/87 ASADSMITNLLKHIKAQE  
 ArD15786 .....V.....T....  
 ArD8194 .....V.....T....  
 ROS/HUVLV-100 .....  
 Kashmanov .....  
 Drosdov .....  
 Turkey-Kelkit06 .....P.....  
 Turkey200310849 .....  
 KosovoHoti .....  
 YL04057 .....  
 79121M18 .....  
 C-68031 .....N.....  
 NIVA118595 .....N.....  
 NIVA118594 .....N.....  
 NIV112143 .....N.....  
 TAJ/HU8966 .....N.....  
 Matin .....  
 Afg09-2990 .....  
 Oman .....  
 Baghdad-12 .....N.V.....V....  
 SPU556/87 .....  
 SPU97/85 .....  
 SPU431/85 .....  
 SPU415/85 .....  
 SPU4/81 .....  
 SPU128/81/7 .....  
 SPU187/90 .....  
 SPU45/88 .....  
 SPU48/90 .....F.....  
 SudanAl-Fulah .....  
 SPU383/87 .....  
 SPU44/08 .....  
 SPU130/89 .....  
 SPU497/88 .....  
 SPU18/88 .....V.....  
 ArD39554 .....  
 SudanAB1-2009 .....  
 Ibar10200 .....  
 Congo3010 .....G.V.....  
 UG3010 .....G.V.....  
 Semunya .....G.V.....  
 AP92 T...N.V.S.....

10  
 SPU103/87 RAQGAQIDTAFSSYYWLYK  
 ArD15786 .....P...F.....  
 ArD8194 .....P...F.....  
 ROS/HUVLV-100 .....P...F.....  
 Kashmanov .....P...F.....  
 Drosdov .....P...F.....  
 Turkey-Kelkit06 .....P...F.....  
 Turkey200310849 .....P...F.....  
 KosovoHoti .....P...F.....  
 YL04057 .....  
 79121M18 .....  
 C-68031 .....  
 NIVA118595 .....  
 NIVA118594 .....  
 NIV112143 .....  
 TAJ/HU8966 .....  
 Matin .....V.....  
 Afg09-2990 .....V.....  
 Oman .....V.....  
 Baghdad-12 .....V.....  
 SPU556/87 .....  
 SPU97/85 .....  
 SPU431/85 .....  
 SPU415/85 .....  
 SPU4/81 .....  
 SPU128/81/7 .....  
 SPU187/90 .....  
 SPU45/88 .....  
 SPU48/90 .....  
 SudanAl-Fulah .....  
 SPU383/87 .....  
 SPU44/08 .....  
 SPU130/89 .....  
 SPU497/88 .....  
 SPU18/88 .....  
 ArD39554 .....  
 SudanAB1-2009 .....  
 Ibar10200 ...S.....  
 Congo3010 .....P...F.....  
 UG3010 .....P...F.....  
 Semunya .....P...F.....  
 AP92 .....P...F.....

10  
 SPU103/87 KMKKALLSTPMKWGKKLYE  
 ArD15786 .....  
 ArD8194 .....  
 ROS/HUVLV-100 .....  
 Kashmanov .....  
 Drosdov .....  
 Turkey-Kelkit06 .....  
 Turkey200310849 .....  
 KosovoHoti .....L.....  
 YL04057 .....L.....  
 79121M18 .....  
 C-68031 .....  
 NIVA118595 .....R.....  
 NIVA118594 .....R.....  
 NIV112143 .....R.....  
 TAJ/HU8966 .....  
 Matin .....  
 Afg09-2990 .....  
 Oman .....  
 Baghdad-12 .....  
 SPU556/87 .....  
 SPU97/85 .....  
 SPU431/85 .....  
 SPU415/85 .....  
 SPU4/81 .....  
 SPU128/81/7 .....  
 SPU187/90 .....  
 SPU45/88 .....  
 SPU48/90 .....  
 SudanAl-Fulah .....  
 SPU383/87 .....  
 SPU44/08 .....  
 SPU130/89 .....  
 SPU497/88 .....  
 SPU18/88 .....  
 ArD39554 .....T.....  
 SudanAB1-2009 .....  
 Ibar10200 .....  
 Congo3010 .....  
 UG3010 .....  
 Semunya .....  
 AP92 .....  
 AP92 .....

10  
 SPU103/87 VANPDDAAQGSHTKSILN  
 ArD15786 .....  
 ArD8194 ..D.....  
 ROS/HUVLV-100 .....  
 Kashmanov .....  
 Drosdov .....  
 Turkey-Kelkit06 .....  
 Turkey200310849 .....  
 KosovoHoti .....  
 YL04057 .....  
 79121M18 .....  
 C-68031 .....  
 NIVA118595 .....  
 NIVA118594 .....  
 NIV112143 .....  
 TAJ/HU8966 ..D.....  
 Matin .....L.....  
 Afg09-2990 .....L.....  
 Oman .....L.....  
 Baghdad-12 .....L.....  
 SPU556/87 .....  
 SPU97/85 .....  
 SPU431/85 .....  
 SPU415/85 .....  
 SPU4/81 .....  
 SPU128/81/7 .....  
 SPU187/90 .....  
 SPU45/88 .....  
 SPU48/90 .....  
 SudanAl-Fulah .....  
 SPU383/87 .....  
 SPU44/08 .....  
 SPU130/89 .....  
 SPU497/88 .....  
 SPU18/88 .....  
 ArD39554 .....  
 SudanAB1-2009 .....  
 Ibar10200 .....  
 Congo3010 .....  
 UG3010 .....  
 Semunya .....  
 AP92 .....

N<sub>397-415</sub>

10  
 SPU103/87 GSGHTKSILNLRNTTETNN  
 ArD15786 .....S.....  
 ArD8194 .....SS.....  
 ROS/HUVLV-100 .....S.....  
 Kashmanov .....S.....  
 Drosdov .....S.....  
 Turkey-Kelkit06 .....S.....  
 Turkey200310849 .....S.....  
 KosovoHoti .....S.....  
 YL04057 .....  
 79121M18 .....  
 C-68031 .....  
 NIVA118595 .....  
 NIVA118594 .....  
 NIV112143 .....  
 TAJ/HU8966 .....  
 Matin .....  
 Afg09-2990 .....  
 Oman .....  
 Baghdad-12 .....  
 SPU556/87 .....  
 SPU97/85 .....  
 SPU431/85 .....  
 SPU415/85 .....  
 SPU4/81 .....  
 SPU128/81/7 .....  
 SPU187/90 .....Q.....  
 SPU45/88 .....  
 SPU48/90 .....  
 SudanAl-Fulah .....  
 SPU383/87 .....S.....  
 SPU44/08 .....  
 SPU130/89 .....  
 SPU497/88 .....  
 SPU18/88 .....  
 ArD39554 .....  
 SudanAB1-2009 .....  
 Ibar10200 .....  
 Congo3010 .....  
 UG3010 .....  
 Semunya .....  
 AP92 .....S..

N<sub>404-424</sub>

10  
 SPU103/87 NIQDMDIVASEHLLHQSLV  
 ArD15786 .....  
 ArD8194 .....  
 ROS/HUVLV-100 .....  
 Kashmanov .....  
 Drosdov .....  
 Turkey-Kelkit06 .....I.....  
 Turkey200310849 .....  
 KosovoHoti .....  
 YL04057 .....  
 79121M18 .....  
 C-68031 .....  
 NIVA118595 .....  
 NIVA118594 .....  
 NIV112143 .....  
 TAJ/HU8966 .....  
 Matin .....  
 Afg09-2990 .....  
 Oman .....  
 Baghdad-12 ...H.....  
 SPU556/87 .....  
 SPU97/85 .....  
 SPU431/85 .....  
 SPU415/85 .....  
 SPU4/81 .....  
 SPU128/81/7 .....  
 SPU187/90 .....  
 SPU45/88 .....  
 SPU48/90 S.....  
 SudanAl-Fulah S.....  
 SPU383/87 .....  
 SPU44/08 .....  
 SPU130/89 .....  
 SPU497/88 .....  
 SPU18/88 .....  
 ArD39554 .....  
 SudanAB1-2009 .....  
 Ibar10200 .....  
 Congo3010 .....  
 UG3010 .....  
 Semunya .....  
 AP92 D.K.....

N<sub>442-460</sub>

10  
 SPU103/87 SEHLLHQSLVKGQSPFQNA  
 ArD15786 .....  
 ArD8194 .....  
 ROS/HUVLV-100 .....  
 Kashmanov .....  
 Drosdov .....  
 Turkey-Kelkit06 .....I.....  
 Turkey200310849 .....  
 KosovoHoti .....  
 YL04057 .....  
 79121M18 .....  
 C-68031 .....  
 NIVA118595 .....  
 NIVA118594 .....  
 NIV112143 .....  
 TAJ/HU8966 .....  
 Matin .....  
 Afg09-2990 .....  
 Oman .....  
 Baghdad-12 .....  
 SPU556/87 .....  
 SPU97/85 .....  
 SPU431/85 .....  
 SPU415/85 .....  
 SPU4/81 .....  
 SPU128/81/7 .....  
 SPU187/90 .....  
 SPU45/88 .....  
 SPU48/90 .....  
 SudanAl-Fulah .....  
 SPU383/87 .....  
 SPU44/08 .....  
 SPU130/89 .....  
 SPU497/88 .....  
 SPU18/88 .....  
 ArD39554 .....  
 SudanAB1-2009 .....  
 Ibar10200 .....  
 Congo3010 .....  
 UG3010 .....  
 Semunya .....  
 AP92 .....

N<sub>451-469</sub>

10

-----|-----|-----

SPU103/87 VGRQSPFQAYNVKGNATS

ArD15786 .....

ArD8194 .....

ROS/HUVLV-100 .....

Kashmanov .....

Drosdov .....

Turkey-Kelkit06 .....

Turkey200310849 .....

KosovoHoti .....

YL04057 .....

79121M18 .....

C-68031 .....

NIVA118595 .....

NIVA118594 .....

NIV112143 .....

TAJ/HU8966 .....

Matin .....

Afg09-2990 .....

Oman .....

Baghdad-12 .....

SPU556/87 .....

SPU97/85 .....

SPU431/85 .....

SPU415/85 .....

SPU4/81 .....

SPU128/81/7 .....

SPU187/90 .....

SPU45/88 .....

SPU48/90 .....

SudanAl-Fulah .....

SPU383/87 .....

SPU44/08 .....

SPU130/89 .....

SPU497/88 .....

SPU18/88 .....

ArD39554 .....

SudanAB1-2009 .....

Ibar10200 .....

Congo3010 .....

UG3010 .....

Semunya .....

AP92 .....

10

-----|-----|-----

SPU103/87 SPFQAYNVKGNATSANII

ArD15786 .....

ArD8194 .....

ROS/HUVLV-100 .....

Kashmanov .....

Drosdov .....

Turkey-Kelkit06 .....

Turkey200310849 .....

KosovoHoti .....

YL04057 .....

79121M18 .....

C-68031 .....

NIVA118595 .....

NIVA118594 .....

NIV112143 .....

TAJ/HU8966 .....

Matin .....

Afg09-2990 .....

Oman .....

Baghdad-12 .....

SPU556/87 .....

SPU97/85 .....

SPU431/85 .....

SPU415/85 .....

SPU4/81 .....

SPU128/81/7 .....

SPU187/90 .....

SPU45/88 .....

SPU48/90 .....

SudanAl-Fulah .....

SPU383/87 .....

SPU44/08 .....

SPU130/89 .....

SPU497/88 .....

SPU18/88 .....

ArD39554 .....

SudanAB1-2009 .....

Ibar10200 .....

Congo3010 .....

UG3010 .....

Semunya .....

AP92 .....

10

-----|-----|-----

SPU103/87 TLHPRIEEGFFDLMHVQKV

ArD15786 .....

ArD8194 .....

ROS-HUVLV-100 .....

Kashmanov .....

Drosdov .....

Turkey-Kelkit06 .....

Turkey200310849 .....

KosovaHoti .....

YL04057 .....

79121M18 .....

C-68031 .....

NIVA118595 .....

NIVA118594 .....

NIV112143 .....

TADJ-HU8966 .....

Matin .....

Afg09-2990 .....

Oman .....

Baghdad-12 .....

SPU556/87 .....

SPU97/85 .....

SPU431/85 .....

SPU415/85 .....

SPU4/81 .....

SPU128/81/7 .....

SPU187/90 .....

SPU45/88 .....

SPU48/90 .....

SudanAl-Fulah3-2008 .....

SPU383/87 .....

SPU44/08 .....

SPU130/89 .....

SPU497/88 .....

SPU18/88 .....

ArD39554 .....

SudanAB1-2009 .....

IbAr10200 .....

Congo3010 .....

UG3010 .....

Semunya .....

AP92 .....

10

-----|-----|-----

SPU103/87 DGCDDLDDYCNMGDWPSCTY

ArD15786 .....

ArD8194 .....

ROS-HUVLV-100 .....

Kashmanov .....

Drosdov .....

Turkey-Kelkit06 .....

Turkey200310849 .....

KosovaHoti .....

YL04057 .....

79121M18 .....

C-68031 .....

NIVA118595 .....

NIVA118594 .....

NIV112143 .....

TADJ-HU8966 .....

Matin .....

Afg09-2990 .....

Oman .....

Baghdad-12 .....

SPU556/87 .....

SPU97/85 .....

SPU431/85 .....

SPU415/85 .....

SPU4/81 .....

SPU128/81/7 .....

SPU187/90 .....

SPU45/88 .....

SPU48/90 .....

SudanAl-Fulah3-2008 .....

SPU383/87 .....

SPU44/08 .....

SPU130/89 .....

SPU497/88 .....

SPU18/88 .....

ArD39554 .....

SudanAB1-2009 .....

IbAr10200 .....

Congo3010 .....

UG3010 .....

Semunya .....

AP92 .....
